# Supplementary material
Source: PubMed Central journal article supplement (PMC6363356)
Supplement: NIHMS980551-supplement-Permission_for_T1.pdf [file NIHMS980551-supplement-Permission_for_T1.pdf]

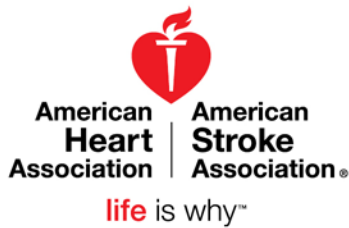

National Center  
7272 Greenville Avenue | Dallas, Texas 75231  
[www.heart.org](http://www.heart.org)

Inv #13935-CBALLANTYNE

May 12, 2018

## **PRINT COPYRIGHT USE AGREEMENT**

Christie Ballantyne  
Baylor College of Medicine  
One Baylor Plaza, MS BCM285  
Houston, TX 77030

Dear Dr. Ballantyne:

Amount Due: **\$330.00 U.S. FUNDS (WAIVED)** (This is a fee for service and not a charitable contribution. Our tax id number is 13-5613797. **Please consider this letter an invoice.**

Approval of this request is contingent upon receipt of a \$330.00 U.S Funds (WAIVED) processing fee and a signed copy of this Agreement (including Exhibit A.) Please send a check (drawn on a U.S. Bank or an international money order) payable to the American Heart Association with a copy of this Agreement to PO Box 841750, Dallas, Texas, 75284-1750. Bank transfer or credit card payment information will be provided upon request.

The conditions of this copyright use agreement are listed below and the specifics of the material to be used are set out on Exhibit A to this Agreement.

1. A credit line must be prominently placed on the page in which the American Heart Association materials appear as shown in Exhibit A.
2. This Agreement shall not be assigned or transferred to an undisclosed third-party without the prior written consent of the AHA. Further, the Requestor represents and affirms that they are requesting the material listed in Exhibit A for their own use and not as an agent or representative of an undisclosed third-party.

*"Building healthier lives,  
free of cardiovascular  
diseases and stroke."*

life is why™ es por la vida™ 全為生命™

Please remember the American Heart Association in your will.

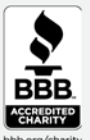

3. Original artwork cannot be supplied, and the requestor agrees to reprint the material exactly as originally published. The American Heart Association (AHA) logo and AHA Service Marks may only be used as they appear on the materials requested. Obvious typographical errors may be corrected and typography may be altered to conform to the proposed publication. No other deletions, alterations, or other changes may be made without the prior written consent of the AHA.

4. American Heart Association materials are developed for educational non-profit use only. We do not allow use of our materials to promote commercial products or companies or to imply an endorsement of, or affiliation with any organization.

5. This permission is granted on a one-time use basis. Rights granted herein are not exclusive and do not apply to future reproductions, editions, revisions, or other derivative works including foreign language editions, and do not apply to any versions via electronic media, including but not limited to "Open Access journals", other than those specified in Exhibit "A".

6. This permission is not valid until we receive payment, verifying email if paid electronically and a signed copy of this agreement. If the payment and the signed agreement are not received within 30 days, the request will be considered withdrawn and no longer in effect. No reminder notices will be sent.

Upon receipt of payment and the signed agreement, permission will be granted on your original request. Your cancelled check, bank transfer documents or credit card statement will be your receipt.

Signature of Requestor



Printed Name

Christie M. Ballantyne

Date

5/14/2018

## **EXHIBIT A**

**Publication Name** – Circulation.2014;129:S1-S45  
2013 ACC/AHA Guideline on the Treatment of Blood Cholesterol to Reduce  
Atherosclerotic Cardiovascular Risk in Adults

Specifically:

Page S11, Table 4. Recommendations for Treatment of Blood Cholesterol to  
Reduce Atherosclerotic Cardiovascular Risk in Adults-  
Statin Treatment

### **Citation/Credit Line:**

**Reprinted with permission  
Circulation.2014;129:S1-S45  
©2014 American Heart Association, Inc.**

### **For Use In:**

a print only version of an editorial titled “LDL-C: Is 160 the new 190?”. The editorial is an invited piece for Circulation Journal.

**Note:** AHA material cannot be published in any Open Access systems/articles
